# Supplementary material for: A stomatal safety-efficiency trade-off constrains responses to leaf dehydration
Source: PubMed Central journal article supplement (PMC6667445; doi:10.1038/s41467-019-11006-1), 2019-07-30
Supplement: 41467_2019_11006_MOESM1_ESM.pdf [file 41467_2019_11006_MOESM1_ESM.pdf]

*Supplementary Information for:*

**“A stomatal safety-efficiency trade-off constrains responses to leaf dehydration**

*Christian Henry<sup>1</sup>, Grace P. John<sup>1,2</sup>, Ruihua Pan<sup>1,3</sup>, Megan K. Bartlett<sup>1,4</sup>, Leila R. Fletcher<sup>1</sup>, Christine Scoffoni<sup>1,5</sup>, Lawren Sack<sup>1\*</sup>*

<sup>1</sup>*Department of Ecology and Evolutionary Biology, University of California Los Angeles, 621 Charles E. Young Drive South, Los Angeles, California, 90095, USA*

<sup>2</sup>*Department of Integrative Biology, University of Texas at Austin, 2415 Speedway, Austin, Texas 78712, USA*

<sup>3</sup>*School of Ecology and Environment, Inner Mongolia University, 235 University West Road, Hohhot, Inner Mongolia 010021, China*

<sup>4</sup>*Department of Viticulture and Enology, University of California Davis, One Shields Avenue, Davis, California, 95616, USA*

<sup>5</sup>*Department of Biological Sciences, California State University, Los Angeles, 5151 State University Drive, Los Angeles, California, 90032, USA*

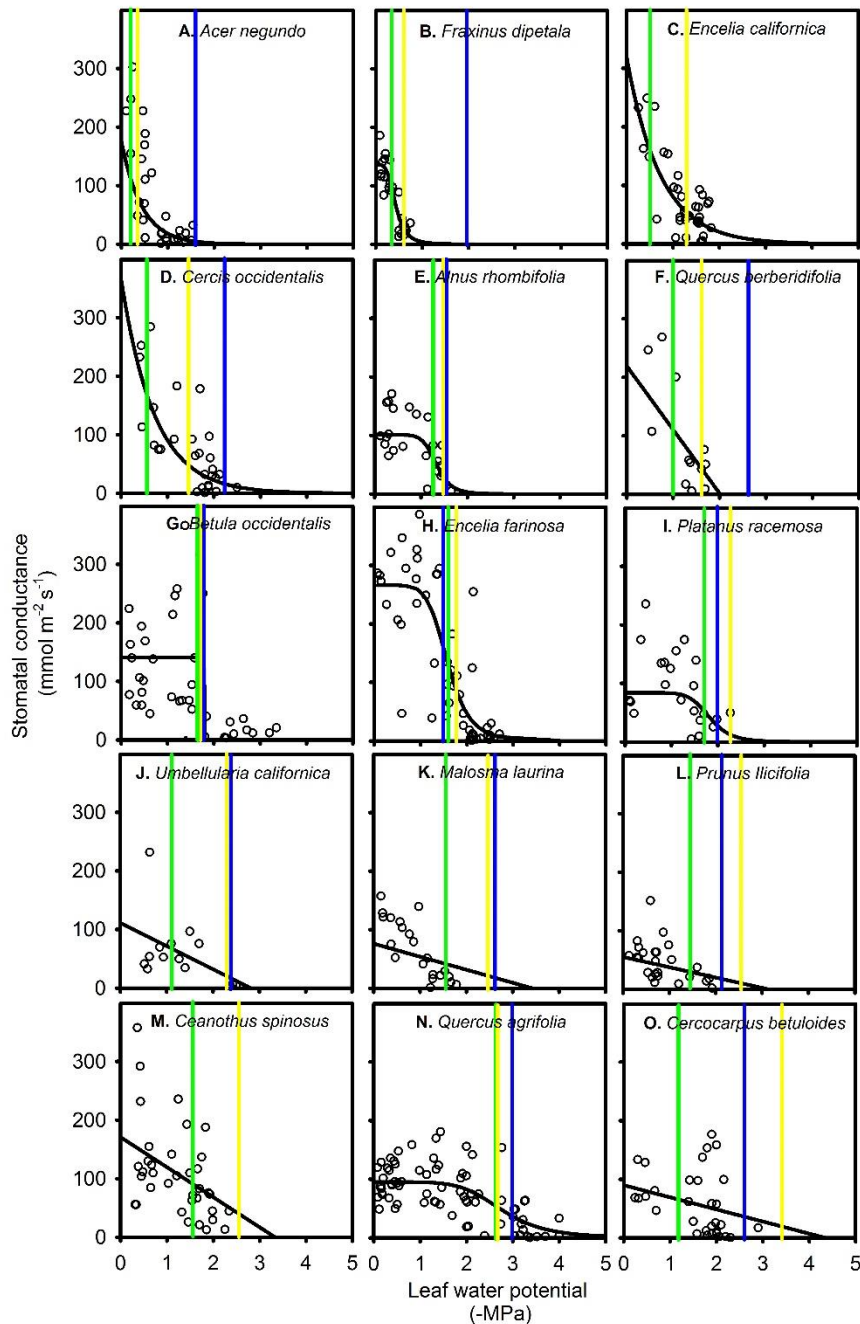

**Supplementary Figure 1.** Responses of stomatal conductance to declining leaf water potential, for 15 California species grown in a common garden design, ordered in panels (A) to (O) from most to least sensitive in response (number of leaves sampled  $n = 14-77$  across species, depending on the range of the response and the availability of plant material). Curves represent the structural model selected by maximum likelihood; the blue green and yellow lines respectively represent leaf water potentials at turgor loss point, and at 50% and 80% stomatal closure. The “refined” dataset is shown for each species, with the plotted stomatal conductance values representing the measured values minus the minimum epidermal conductance. Source data are provided as a Source Data file.

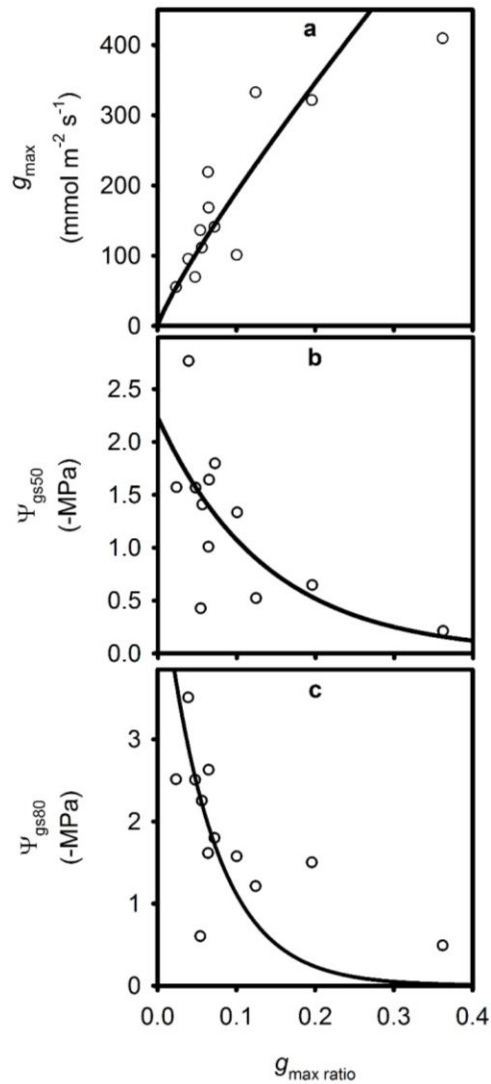

**Supplementary Figure 2.** Relationships between (A) maximum stomatal conductance ( $g_{\max}$ ), and the leaf water potentials at which stomatal conductance declined by (B) 50% and (C) 80% ( $\Psi_{gs50}$  and  $\Psi_{gs80}$  respectively) with the stomatal opening ratio ( $g_{\max \text{ ratio}} = g_{\max} / \text{maximum anatomical stomatal conductance}$ ) for California species grown in a common garden design. Lines are standard major log-transformed data, i.e., for power law fits. Phylogenetic least squares regression  $r$  values were 0.63, 0.62, and 0.86 ( $P$ -values 0.03, 0.03 and 0.0004) for panels A, B and C respectively. The  $g_{\max}$ ,  $\Psi_{gs50}$  and  $\Psi_{gs80}$  were derived from fitted curves (Supplementary Figure 1). Source data are provided as a Source Data file.

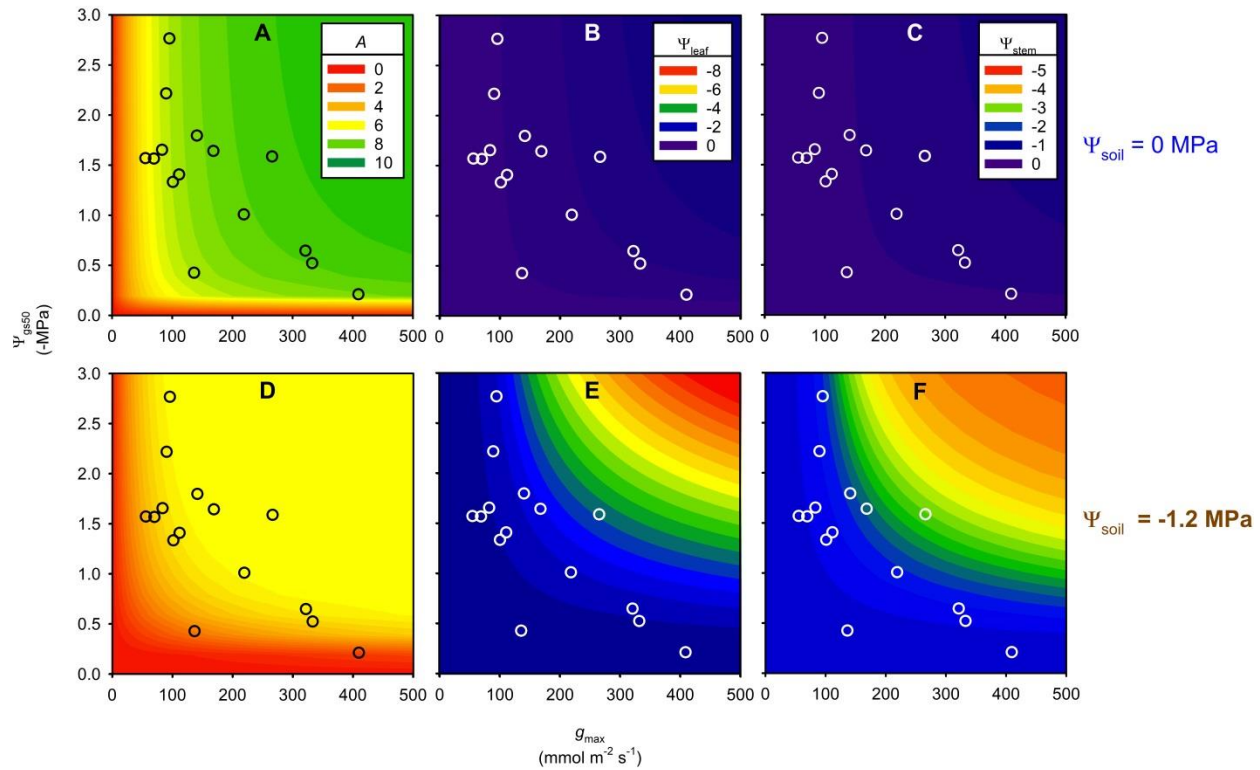

**Supplementary Figure 3.** Testing for a benefit in plant hydraulic design of a stomatal efficiency-safety trade-off, using a plant hydraulic-stomatal model. (A and D) Modelled light saturated photosynthetic rate ( $A$ ; units:  $\mu\text{mol m}^{-2} \text{s}^{-1}$ ) for simulated species with varying combinations of maximum stomatal conductance ( $g_{\text{max}}$ ) and sensitivity to stomatal closure ( $\Psi_{\text{gs50}}$ ) under high water availability, i.e., soil water ( $\Psi_{\text{soil}}$ ) of 0 MPa or under low water availability, i.e.,  $\Psi_{\text{soil}}$  of -1.2 MPa, showed that higher  $A$  is achieved by species with higher  $g_{\text{max}}$  or less sensitive stomatal closure (low  $\Psi_{\text{gs50}}$ ); (B, C, E and F) modelled leaf and stem water potentials ( $\Psi_{\text{leaf}}$  and  $\Psi_{\text{stem}}$  respectively; units: MPa) showed that steep declines in  $\Psi_{\text{leaf}}$  and  $\Psi_{\text{stem}}$  occurred for species with higher  $g_{\text{max}}$  and insensitive stomata (i.e., very negative  $\Psi_{\text{gs50}}$ ), with both  $\Psi_{\text{leaf}}$  and  $\Psi_{\text{stem}}$  showing extreme values under drought, whereas species with high  $\Psi_{\text{gs50}}$  were protected from dehydration stress. The plotted points represent the 15 California species, for which the observed  $g_{\text{max}}$  vs  $\Psi_{\text{gs50}}$  trade-off positioned these species in the sweet spot, maintaining  $A$  under high water availability and avoiding hydraulic damage during drought. See Methods for model description and parameterization. Source data are provided as a Source Data file.

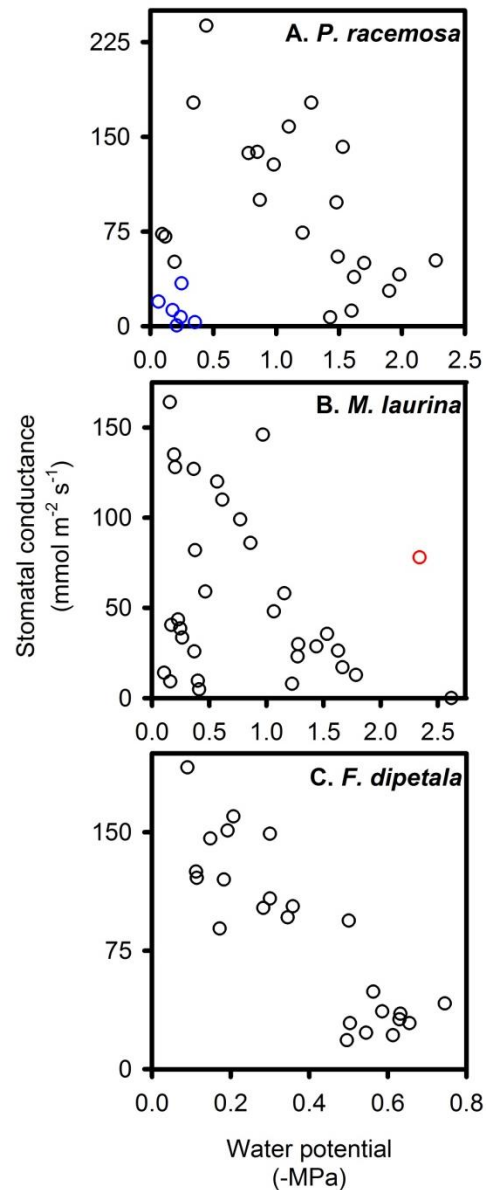

**Supplementary Figure 4.** Response of stomatal conductance to decline in leaf water potential for three species, showing infrequent “squeeze” points, i.e., closed stomata at high water potentials (panel A, blue points), or a “re-opening” point, i.e., stomata open at very low water potentials (panel B, red point), and a species’ response that lacked either (panel C). The plotted stomatal conductance values represent the measured values minus the minimum epidermal conductance. Source data are provided as a Source Data file.

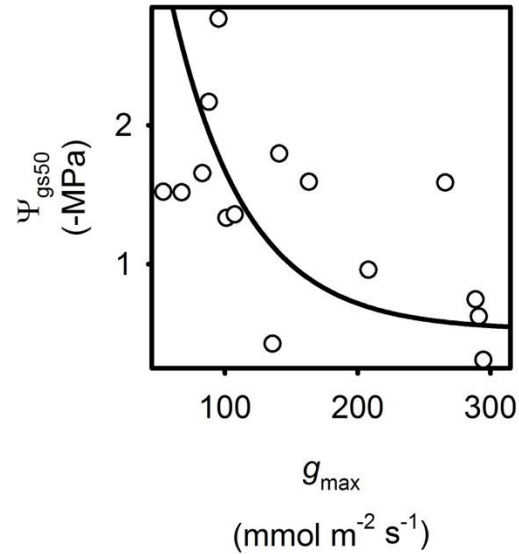

**Supplementary Figure 5.** The stomatal safety-efficiency trade-off, i.e., the relationship of leaf water potential at 50% stomatal closure during dehydration ( $\Psi_{gs50}$ ) to maximum stomatal conductance ( $g_{\max}$ ) for 15 California species grown in a common garden design, using an alternative calculation of  $g_{\max}$  and  $\Psi_{gs50}$ . Here,  $g_{\max}$  was estimated as stomatal conductance ( $g_s$ ) estimated from the selected  $g_s$  versus leaf water potential ( $\Psi_{\text{leaf}}$ ) functions at  $\Psi_{\text{leaf}} = -0.1$  MPa, and  $\Psi_{gs50}$  was estimated as the  $\Psi_{\text{leaf}}$  at which that  $g_s$  declined by 50%; we found a similar  $g_{\max} - \Psi_{gs50}$  trade-off (phylogenetic  $r = 0.61$ ;  $P = 0.015$ ). The fitted line is a standard major axis fitted to log-transformed data, i.e., for a power law fit. Source data are provided as a Source Data file.
